# Supplementary material for: In Vivo Molecular MRI Imaging of Prostate Cancer by Targeting PSMA with Polypeptide-Labeled Superparamagnetic Iron Oxide Nanoparticles
Source: PubMed Central journal article supplement (PMC4463605; doi:10.3390/ijms16059573), 2015-04-28
Supplement: ijms-16-09573-s001.pdf [file ijms-16-09573-s001.pdf]

## Supplementary Information

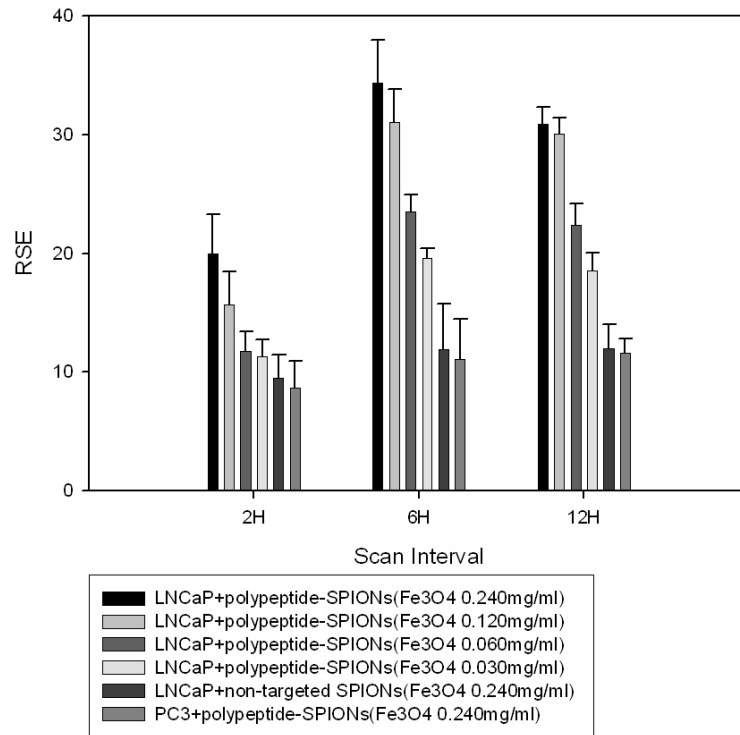

**Figure S1.** RSE measurements in LNCaP tumor-bearing mice injected with polypeptide-SPIONs, non-targeted SPIONs and PC3 tumor-bearing mice injected with polypeptide-SPIONs.

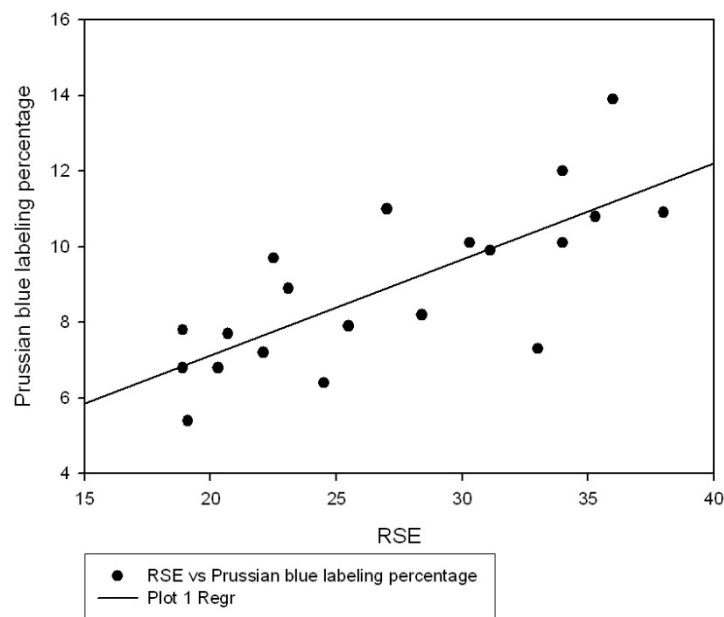

**Figure S2.** Correlation between RSE and Prussian blue labeling density in LNCaP tumor-bearing mice injected with polypeptide-SPIONs.
